# Supplementary material for: Synthetic Melanin Acts as Efficient Peptide Carrier in Cancer Vaccine Strategy
Source: MDPI journal article supplement (doi:10.3390/ijms232314975), 2022-11-29
Supplement: s1 [file s1]

## Supplementary figures

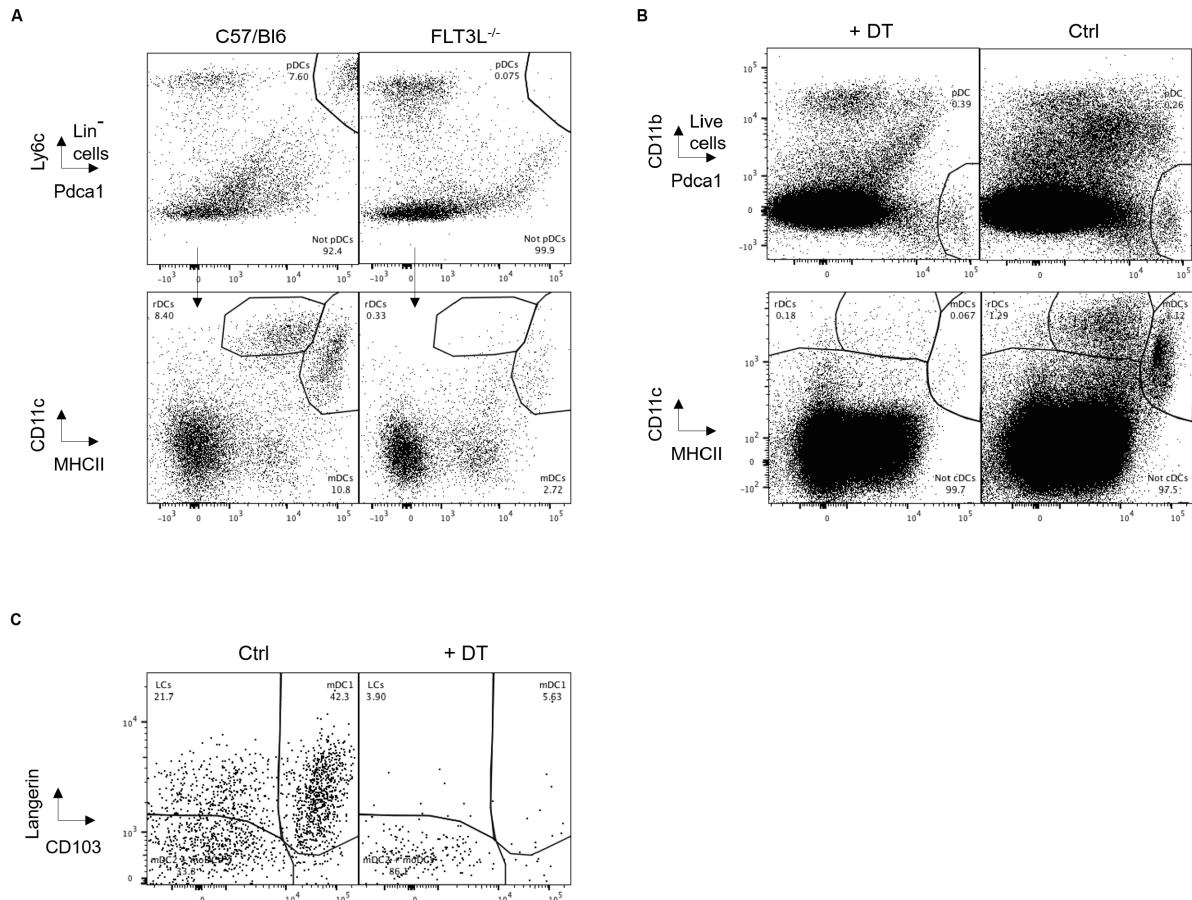

**Figure S1. Lymph node depletion of dendritic cells in *FLT3L<sup>-/-</sup>* mice and zDC<sup>DTR</sup> chimera after DT injection and Langerin<sup>+</sup> cells in Langerin<sup>DTR</sup> mice.**

Cytometry analysis of lymph node cells in *FLT3L<sup>-/-</sup>* mice and control mice (A) and zDC<sup>DTR</sup> chimera 24 hours after 1 injection of DT (B). (C) Depletion of Langerin<sup>+</sup> cells in Langerin<sup>DTR</sup> mice after DT injection compared to control mice without DT injection.

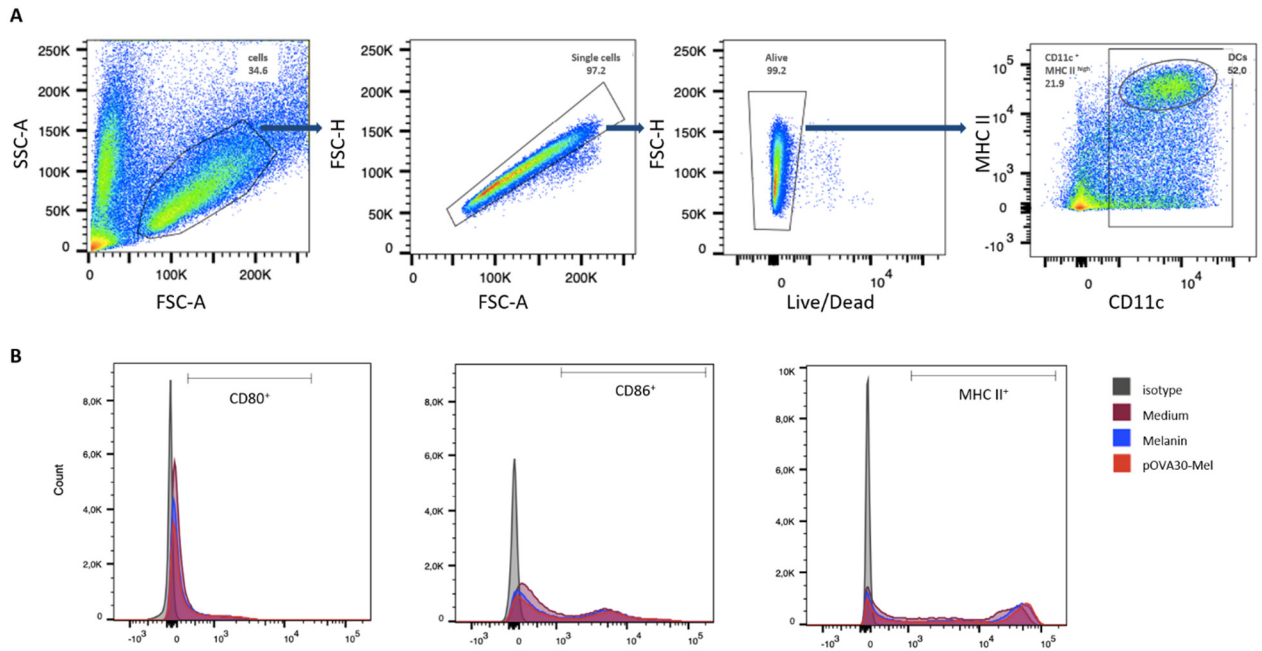

**Figure S2. Effects of L-DOPA melanin and pOVA30-Mel nanoaggregates on maturation and activation of GM CSF dendritic cells.**

Cytometry analysis of bone marrow derived dendritic cells (by GM CSF) after 24 hours incubation with melanin, pOVA30-Mel, or medium as negative control ( $5 \times 10^5$  cells/mL; 2 mL/well). Concentrations used for the different solutions: melanin at 4  $\mu$ g/mL, pOVA30 at 2  $\mu$ g/mL, CpG at 1  $\mu$ g/mL. (A) Cells were gated on living cells or living CD11c<sup>+</sup> cells to assess the percentage of mature dendritic cells. (B) Representative MFI of CD80<sup>+</sup> CD86<sup>+</sup> or MHC II<sup>+</sup> cells in the indicated conditions.

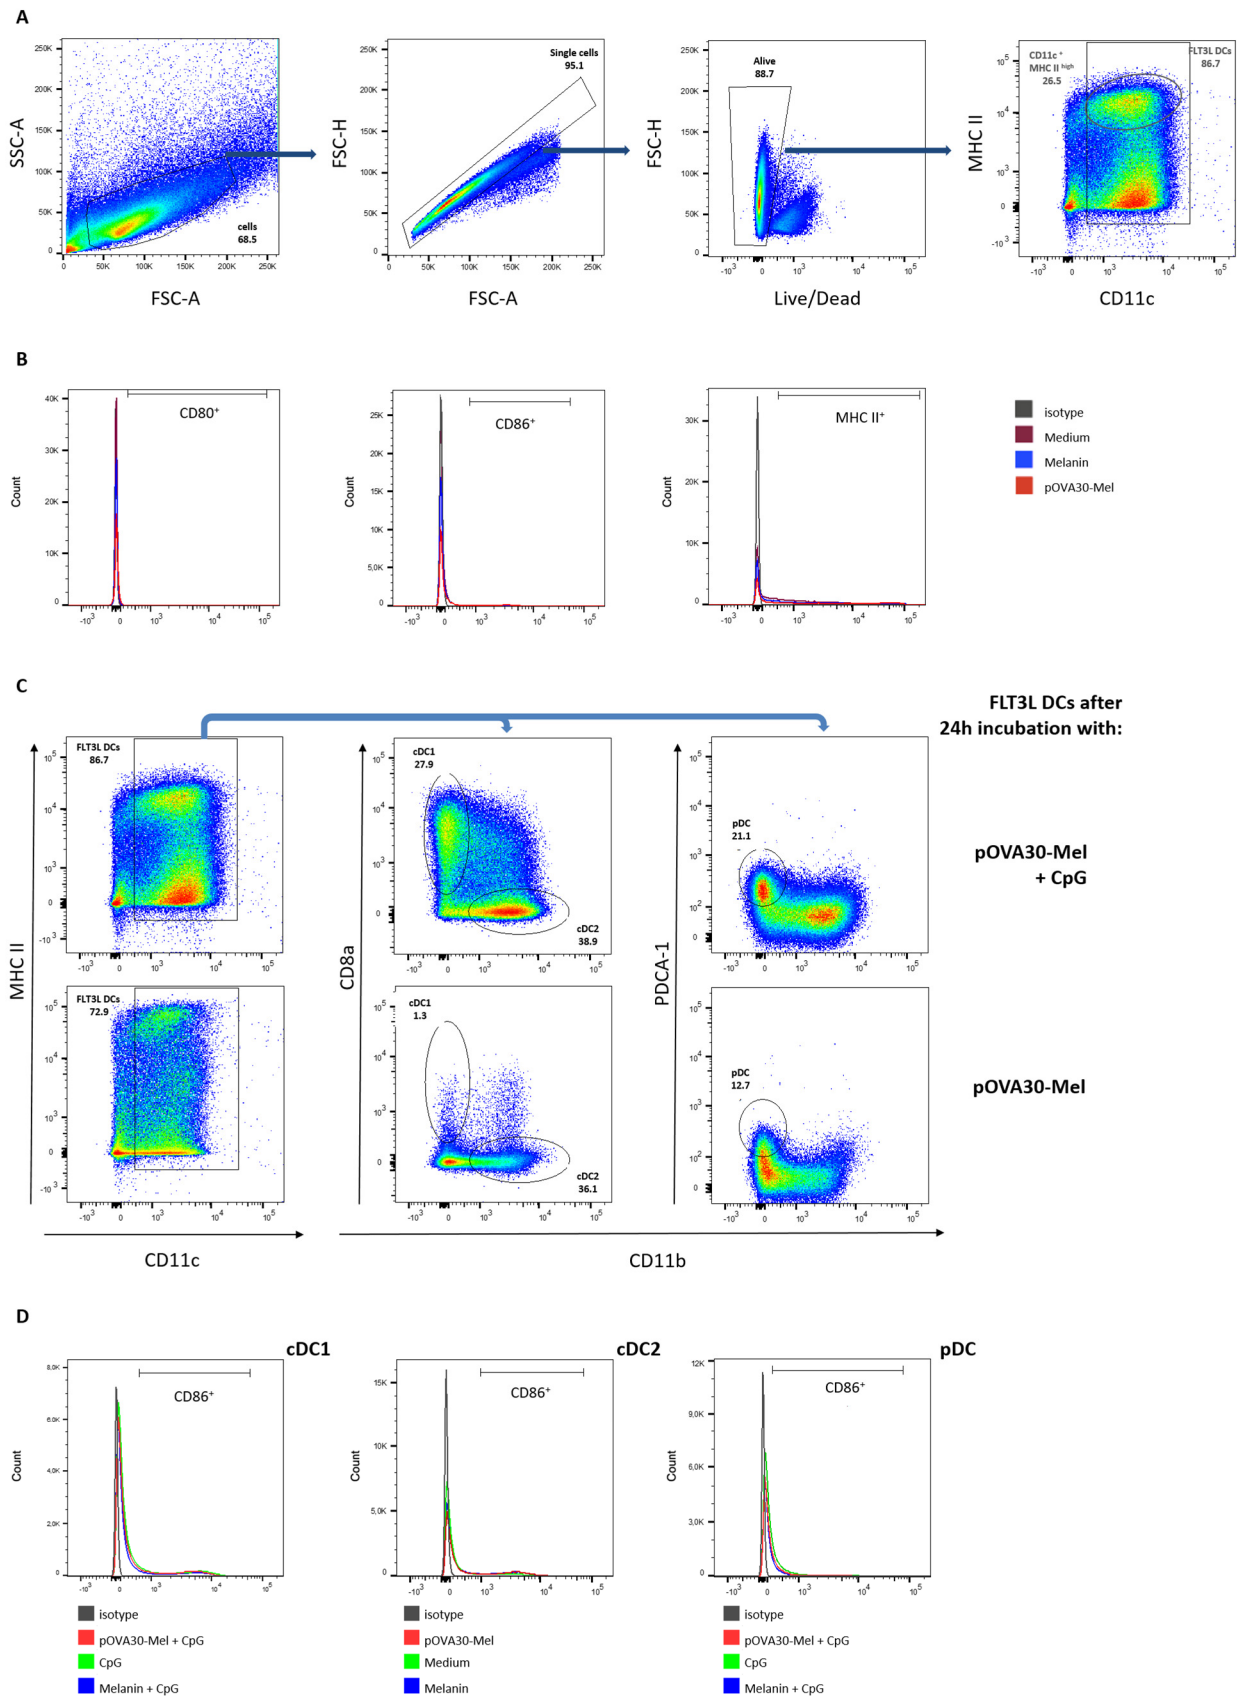

**Figure S3. Effects of L-DOPA melanin and pOVA30-Mel nanoaggregates on maturation and activation of FLT3L DCs.**

Cytometry analysis of cDC1, cDC2 and pDCs (FLT3L DCs) after 24 hours incubation with melanin, pOVA30, pOVA30-Mel, CpG, melanin and CpG, pOVA30 and CpG, pOVA30-Mel and CpG or medium as negative control ( $5 \times 10^5$  cells/mL; 2 mL/well). Concentrations used for the different solutions: melanin at 4  $\mu$ g/mL, pOVA30 at 2  $\mu$ g/mL, CpG at 1  $\mu$ g/mL. (A) Cells were gated on living cells or living CD11c<sup>+</sup> cells to assess the percentage of mature dendritic cells or the expression of CD80, CD86 and MHC II as MFI (B). (C) Cells were gated on living double positive CD11c<sup>+</sup> CD8 $\alpha$ <sup>+</sup> and CD11b<sup>-</sup> cells (cDC1), double positive CD11c<sup>+</sup> CD11b<sup>+</sup> and CD8 $\alpha$ <sup>-</sup> cells (cDC2) or double positive CD11c<sup>+</sup> PDCA-1<sup>+</sup> and CD11b<sup>-</sup> cells (pDC) to assess the expression of CD80, CD86 and MHC II for each subpopulation (D). (B) and (D) report representative MFI of CD80<sup>+</sup> CD86<sup>+</sup> or MHC II<sup>+</sup> cells in the indicated conditions and cell subtype.

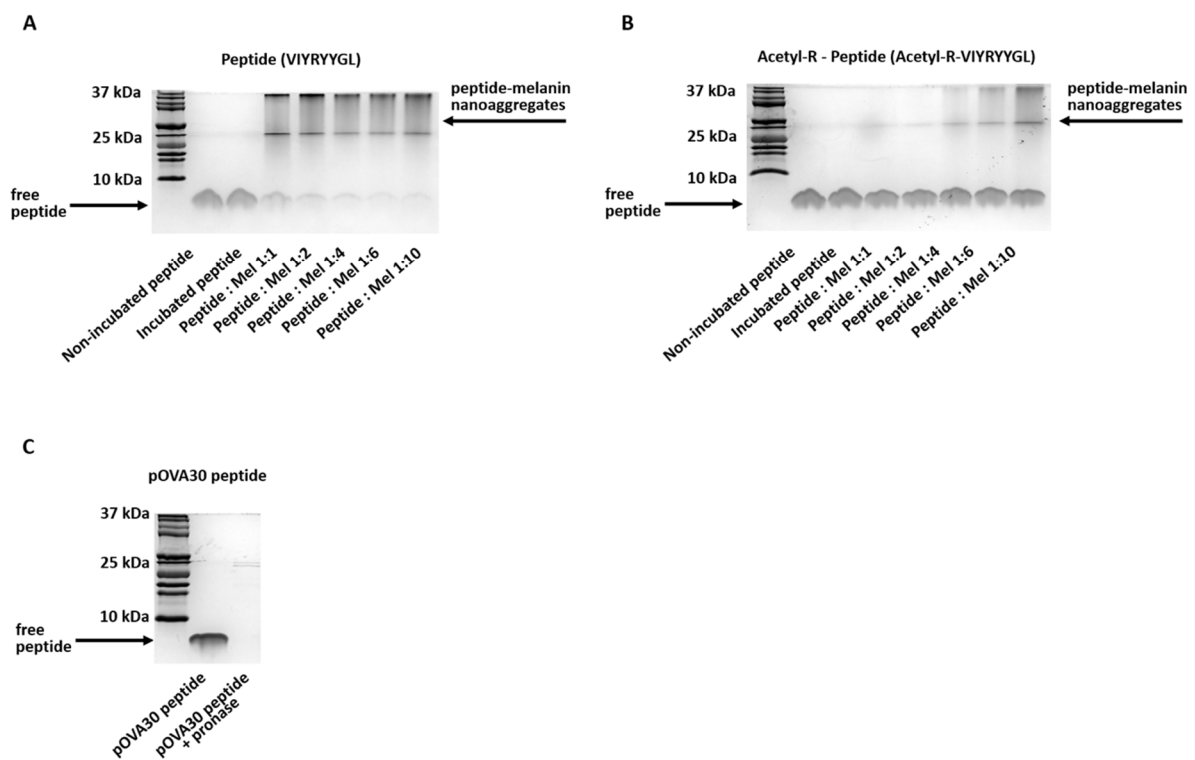

**Figure S4.** L-DOPA melanin protects pOVA30 peptide from enzymatic digestion

SDS-PAGE showing the migration of the indicated peptide within the resolving gel. (A, B) SDS-PAGE showing the peptide remaining (not bound to melanin, indicated as free peptide) after polymerization of L-DOPA at the indicated ratio peptide:melanin. The peptide-melanin nano-aggregates remain at the first phase of gel. Not-incubated peptide (extemporary) and incubated peptide (at the same conditions of the other solutions but without L-DOPA solution) represent controls. (C) SDS-PAGE showing the migration of pOVA30 peptide and its full digestion after incubation with pronase (peptide not visible).
